# Supplementary material for: Functional Yogurt Fortified with Honey Produced by Feeding Bees Natural Plant Extracts for Controlling Human Blood Sugar Level
Source: MDPI journal article supplement (doi:10.3390/plants11111391), 2022-05-24
Supplement: s1 [file s1]

**Table S1.** Basic blood parameters of volunteers at the beginning and the end of clinical trial for each studied group

| Measured paramters                                     | Group (1) |       | Group (2) |       | Group (3) |       | Group (4) |       |
|--------------------------------------------------------|-----------|-------|-----------|-------|-----------|-------|-----------|-------|
|                                                        | Before    | After | Before    | After | Before    | After | Before    | After |
| Serum sugar touches (hungry)                           | 4.77      | 4.27  | 4.91      | 4.92  | 5.28      | 5.07  | 4.81      | 3.73  |
| HbA1c                                                  | 5.35      | ----- | 5.52      | 5.45  | 5.62      | 5.20  | 5.29      | 4.90  |
| HbA1c mmol / mol                                       | 35.3      | ----- | 36.9      | 35.5  | 38.0      | 33.0  | 34.3      | 30.0  |
| Urea touches. from serum                               | 4.56      | 4.45  | 5.54      | 5.15  | 5.01      | 4.90  | 5.16      | 4.84  |
| Determination of creatinine / enzymatic / eGFR-EPI     | 62.5      | 65.4  | 76.1      | 67.7  | 63.3      | 63.7  | 69.3      | 71.1  |
|                                                        | 89.3      | 90.0  | 82.8      | 87.4  | 88.1      | 90.0  | 87.8      | 88.3  |
| Determination of sodium from serum                     | 141       | 141   | 140       | 140   | 142       | 140   | 141       | 141   |
| Potassium touches. In serum                            | 4.54      | 4.36  | 4.48      | 4.58  | 4.61      | 4.42  | 4.36      | 4.19  |
| Determination of chloride in serum                     | 106       | 104   | 107       | 106   | 106       | 106   | 106       | 105   |
| GOT me a decision                                      | 20.9      | 19.3  | 22.6      | 24.9  | 19.4      | 20.7  | 19.7      | 20.3  |
| Definition of GPT                                      | 22.6      | 21.5  | 28.2      | 27.0  | 24.1      | 19.5  | 20.9      | 19.1  |
| L-T-glutamyl transferase.                              | 30.7      | 33.7  | 41.1      | 33.5  | 25.1      | 19.7  | 20.8      | 19.8  |
| Determination of alkaline phosphatase                  | 182       | 176   | 181       | 156   | 179       | 150   | 178       | 171   |
| Determination of cholesterol (total)                   | 5.3       | 5.3   | 6.0       | 6.0   | 5.3       | 5.2   | 5.4       | 5.4   |
| Determination of HDL cholesterol                       | 1.54      | 1.53  | 1.28      | 1.27  | 1.42      | 1.39  | 1.53      | 1.53  |
| Determination of LDL cholesterol                       | 3.56      | 3.51  | 3.86      | 3.88  | 3.21      | 2.99  | 3.33      | 3.24  |
| Determination of triglycerides                         | 1.25      | 1.15  | 2.63      | 3.45  | 1.99      | 1.65  | 1.10      | 1.14  |
| Uric acid touches. from serum                          | 303       | 273   | 323       | 312   | 288       | 312   | 260       | 265   |
| Determination of cholinesterase                        | 8523      | 8315  | 8744      | 8164  | 8454      | 7618  | 7824      | 7495  |
| Determination of creatine kinase                       | 138       | 123   | 149       | 170   | 145       | 164   | 129       | 140   |
| Lactate dehydrogenase                                  | 448       | 389   | 481       | 448   | 392       | 462   | 421       | 422   |
| Alpha-amylase affects. in serum                        | 59.8      | 61.1  | 47.9      | 44.3  | 57.5      | 51.7  | 71.7      | 64.4  |
| Determination of lipase                                | 36.8      | 48.5  | 27.2      | 37.2  | 42.4      | 44.2  | 41.3      | 38.9  |
| Calcium from serum                                     | 2.33      | 2.33  | 2.28      | 2.26  | 2.30      | 2.27  | 2.29      | 2.32  |
| Determination of magnesium from serum                  | 0.87      | 1.01  | 0.89      | 0.89  | 0.88      | 0.87  | 0.86      | 0.89  |
| Determination of iron from serum                       | 18.3      | 12.8  | 15.2      | 16.7  | 15.2      | 15.9  | 16.3      | 17.5  |
| Determination of total iron-binding capacity           | 62.3      | 59.9  | 61.5      | 59.0  | 61.7      | 53.7  | 59.9      | 56.1  |
| Transferrin                                            | 2.61      | 2.80  | 2.51      | 2.70  | 2.73      | 2.51  | 2.67      | 2.63  |
| Determination of ferritin                              | 71.4      | 62.6  | 136.5     | 183.0 | 93.7      | 108.9 | 77.5      | 84.6  |
| Quantitative determination of reactive protein C (CRP) | 1.97      | 8.90  | 2.76      | 1.52  | 2.39      | 0.36  | 1.71      | 0.37  |
| Serum total protein                                    | 69.07     | 63.79 | 68.64     | 68.07 | 70.14     | 68.80 | 70.88     | 67.93 |
| Determination of albumin in serum                      | 45.33     | 44.64 | 43.64     | 43.36 | 43.79     | 44.10 | 46.13     | 45.36 |
| Albumin                                                | 65.96     | 66.73 | 69.30     | 68.29 | 65.20     | 65.70 | 63.80     | 70.4  |
| Alpha-1 globulin                                       | 2.27      | 2.30  | 2.15      | 2.14  | 3.00      | 2.53  | 2.70      | 2.70  |
| Alpha-2 globulin                                       | 8.88      | 8.74  | 8.20      | 8.49  | 9.70      | 36.30 | 9.00      | 7.60  |
| β-globulin                                             | 9.99      | 10.35 | 10.65     | 10.41 | 10.90     | 10.47 | 13.30     | 9.30  |
| Gamma globulin                                         | 12.9      | 11.8  | 9.7       | 10.7  | 11.2      | 12.3  | 10.2      | 10.7  |
| BRANCH                                                 | 1.97      | 2.03  | 5.95      | 2.19  | 1.90      | 2.07  | 1.80      | 2.40  |
| Immunoglobulin G                                       | 13.0      | 12.5  | 12.7      | 12.0  | 12.5      | 12.3  | 12.5      | 11.7  |

|                                                    |       |      |       |       |      |       |      |       |
|----------------------------------------------------|-------|------|-------|-------|------|-------|------|-------|
| Immunoglobulin A                                   | 2.16  | 2.15 | 1.98  | 2.20  | 2.46 | 2.23  | 2.53 | 2.45  |
| Immunoglobulin M                                   | 1.27  | 1.24 | 0.94  | 0.88  | 1.20 | 1.34  | 1.25 | 1.22  |
| White blood cell count                             | 7.33  | 7.03 | 8.17  | 7.10  | 7.34 | 7.17  | 7.00 | 6.84  |
| Red blood cell count                               | 4.66  | 4.75 | 4.60  | 4.79  | 4.69 | 4.58  | 4.82 | 31.41 |
| Hemoglobin                                         | 143   | 138  | 141   | 140   | 135  | 135   | 138  | 136   |
| Hematocrit                                         | 0.42  | 0.42 | 0.41  | 0.43  | 0.42 | 0.41  | 0.42 | 0.42  |
| MCV                                                | 90.0  | 88.9 | 89.6  | 89.1  | 88.8 | 161.2 | 87.6 | 88.7  |
| MCH                                                | 30.7  | 27.6 | 30.7  | 29.4  | 29.0 | 29.4  | 28.7 | 28.7  |
| MCHC                                               | 340   | 329  | 342   | 324   | 326  | 329   | 328  | 318   |
| Absolute neutrophil                                | 4.00  | 3.91 | 4.96  | 4.16  | 4.31 | 4.22  | 4.25 | 4.15  |
| Neutrophil                                         | 54.4  | 55.1 | 60.5  | 57.9  | 58.1 | 62.4  | 59.9 | 59.9  |
| Absolute lymphocyte                                | 2.56  | 2.33 | 2.37  | 2.10  | 2.30 | 1.94  | 1.98 | 1.91  |
| Lymphocyte                                         | 35.0  | 33.5 | 28.9  | 31.8  | 31.6 | 27.7  | 28.9 | 28.6  |
| Absolute monocyte                                  | 0.53  | 0.54 | 0.53  | 0.53  | 0.57 | 0.52  | 0.55 | 0.57  |
| Monocyte                                           | 7.13  | 7.79 | 6.85  | 7.53  | 7.79 | 7.50  | 8.00 | 8.60  |
| Absolute eosinophil                                | 0.16  | 2.06 | 0.22  | 0.15  | 0.14 | 0.15  | 0.16 | 0.17  |
| Eosinophil                                         | 2.33  | 2.29 | 2.85  | 2.47  | 2.00 | 2.40  | 2.25 | 2.56  |
| Absolute basophil                                  | 0.06  | 0.05 | 0.04  | 0.04  | 0.04 | 0.05  | 0.05 | 0.04  |
| Basophil                                           | 0.67  | 0.86 | 0.46  | 0.60  | 0.86 | 0.80  | 0.75 | 0.75  |
| Prothrombin, Time                                  | 10.87 | 9.98 | 11.16 | 11.21 | 0.34 | 0.28  | 0.35 | 0.29  |
| Activated partial thromboplastin time<br>(Control) | 29.7  | 30.9 | 29.2  | 30.6  | 1.0  | 1.0   | 11.0 | 10.9  |
| Activated partial thromboplastin time<br>(Patient) | 30.7  | 28.2 | 30.4  | 28.8  | 30.1 | 29.6  | 1.0  | 1.0   |
| Thrombin time (Control)                            | 20.3  | 19.9 | 20.2  | 20.0  | 30.9 | 30.3  | 30.0 | 30.0  |
| Thrombin time (Sick)                               | 18.4  | 17.0 | 17.9  | 17.6  | 19.3 | 20.0  | 32.5 | 32.3  |

**Table S2:** List of the WHO code, and the methods, which used to measure all parameters in Table 2 and their instruments

| <b>WHO code</b> | <b>Test Name</b>                                              | <b>INSTRUMENT</b> | <b>METHOD</b>                                                               |
|-----------------|---------------------------------------------------------------|-------------------|-----------------------------------------------------------------------------|
| 21020           | Determination of total protein in serum                       | Siemens Advia XPT | Biuret method without samples                                               |
| 21040           | Determination of albumin in serum by the dye - binding method | Siemens Advia XPT | Bromocresol green (BCG) method                                              |
| 21072           | Quantitative determination of reactive protein C (CRP)        | Siemens Advia XPT | Immunoturbidimetry                                                          |
| 21120           | Determination of urea in serum                                | Siemens Advia XPT | Urease-GLDH method, enzymatic UV test                                       |
| 21130           | Determination of uric acid                                    | Siemens Advia XPT | Uricase / POD / 4-aminoantipyrine ADPS method with ascorbate oxidase (ASOD) |
| 21143           | Determination of creatinine by enzymatic method               | Siemens Advia XPT | Enzymatic photometric test (PAP method)                                     |
| 21312           | Determination of glucose by the hexokinase method             | Siemens Advia XPT | Hexokinase method                                                           |
| 21411           | Determination of triglycerides                                | Siemens Advia XPT | GPO-PAP method                                                              |
| 2142A           | Determination of HDL cholesterol by direct method             | Siemens Advia XPT | Direct HDL cholesterol method                                               |
| 21420           | Determination of total cholesterol                            | Siemens Advia XPT | Enzymatic CHOD-PAP method                                                   |
| 21422           | Determination of LDL cholesterol by direct method             | Siemens Advia XPT | Direct LDL cholesterol method                                               |
| 21500           | Determination of sodium in serum                              | Siemens Advia XPT | Ion selective electrode (ISE), indirect potentiometry                       |
| 21501           | Determination of potassium in serum                           | Siemens Advia XPT | Ion selective electrode (ISE), indirect potentiometry                       |
| 21510           | Determination of total calcium                                | Siemens Advia XPT | Ortho-cresolphthalein complexone method                                     |
| 21571           | Determination of magnesium                                    | Siemens Advia XPT | Xylidyl blue color former                                                   |
| 22885           | Determination of alpha-amylase in body fluids                 | Siemens Advia XPT | EPS-G7 (liquid)                                                             |
| 24500           | Determination of lactic acid dehydrogenase (LDH)              | Siemens Advia XPT | DGKCh method                                                                |
| 24600           | Determination of aspartate aminotransferase (ASAT, GOT)       | Siemens Advia XPT | IFCC standardized method without pyridoxal phosphate                        |
| 24610           | Determination of alanine aminotransferase (ALAT, SGPT)        | Siemens Advia XPT | IFCC standardized method without pyridoxal phosphate                        |

|       |                                                            |                      |                                                 |
|-------|------------------------------------------------------------|----------------------|-------------------------------------------------|
| 24620 | Determination of creatine kinase (CK)                      | Siemens Advia XPT    | IFCC reference method                           |
| 24640 | Determination of gamma-glutamyltransferase                 | Siemens Advia XPT    | IFCC reference method                           |
| 24700 | Determination of alpha-amylase in serum                    | Siemens Advia XPT    | EPS-G7 (liquid)                                 |
| 24710 | Determination of lipase                                    | Siemens Advia XPT    | Enzymatic photometric test (liquid)             |
| 24720 | Determination of alkaline phosphatase                      | Siemens Advia XPT    | Standard (DGKCh) method                         |
| 24741 | Determination of pseudo-cholinesterase                     | Siemens Advia XPT    | Substrate: butyrylthiocholine iodide, DGKCh'94  |
| 2678A | Determination of IgM                                       | Siemens Advia XPT    | Turbidimetry                                    |
| 26780 | Determination of IgG                                       | Siemens Advia XPT    | Turbidimetry                                    |
| 26788 | Determination of IgA                                       | Siemens Advia XPT    | Turbidimetry                                    |
| 28014 | Blood count with automatic machine IV.                     | Sysmex XN 1000       | Machine counting of electrical / optical pulses |
| 28330 | Determination of iron-binding capacity                     | Siemens Advia XPT    | ADVIA CHEMISTRY TIBC                            |
| 28350 | Definition of iron                                         | Siemens Advia XPT    | Ferrosin / Ferrene method                       |
| 28360 | Determination of total transferrin                         | Siemens Advia XPT    | Turbidimetry                                    |
| 28390 | Determination of ferritin                                  | Siemens Advia XPT    | Immunoturbidimetry                              |
| 28494 | Determination of hemoglobin A1c by HPLC, mass spectrometry | Arkray ADAMS HA-8180 | Ion exchange chromatography                     |
| 28610 | Determination of thrombin time                             | Sysmex CS-5100       | Turbidimetry                                    |
| 28620 | Determination of prothrombin                               | Sysmex CS-5100       | Turbidimetry                                    |
| 28621 | Activated partial thromboplastin time                      | Sysmex CS-5100       | Turbidimetry                                    |
